# Supplementary material for: Immunological Molecular Responses of Human Retinal Pigment Epithelial Cells to Infection With Toxoplasma gondii
Source: Front Immunol. 2019 May 1;10:708. doi: 10.3389/fimmu.2019.00708 (PMC6506780; doi:10.3389/fimmu.2019.00708)
Supplement: Supplementary file 6 [file Table_9.XLSX]

## Sheet: Table S9. CAMERA Pathway
reactome_id	path_name	NGenes	Direction	PValue	FDR corrected p-values
380108	Homo sapiens: Chemokine receptors bind chemokines	15	Up	6.48603e-16	1.0462e-12
68962	Homo sapiens: Activation of the pre-replicative complex	28	Up	2.51488e-13	2.02825e-10
113510	Homo sapiens: E2F mediated regulation of DNA replication	26	Up	4.99139e-12	2.6837e-09
176187	Homo sapiens: Activation of ATR in response to replication stress	36	Up	3.35088e-11	1.35124e-08
69205	Homo sapiens: G1/S-Specific Transcription	13	Up	2.87881e-10	9.28703e-08
69190	Homo sapiens: DNA strand elongation	30	Up	3.4557e-09	9.29007e-07
69481	Homo sapiens: G2/M Checkpoints	49	Up	2.19283e-08	5.05291e-06
69206	Homo sapiens: G1/S Transition	97	Up	1.6426e-07	3.3119e-05
2142770	Homo sapiens: Synthesis of 15-eicosatetraenoic acid derivatives	2	Up	2.70647e-07	4.85059e-05
375276	Homo sapiens: Peptide ligand-binding receptors	36	Up	3.71582e-07	5.47786e-05
5250968	Homo sapiens: Toxicity of botulinum toxin type A (BoNT/A)	1	Up	4.07528e-07	5.47786e-05
5250992	Homo sapiens: Toxicity of botulinum toxin type E (BoNT/E)	1	Up	4.07528e-07	5.47786e-05
418594	Homo sapiens: G alpha (i) signalling events	39	Up	4.75141e-07	5.8954e-05
373076	Homo sapiens: Class A/1 (Rhodopsin-like receptors)	56	Up	7.29558e-07	8.40554e-05
176974	Homo sapiens: Unwinding of DNA	11	Up	1.43801e-06	0.000144969
500792	Homo sapiens: GPCR ligand binding	73	Up	1.37576e-06	0.000144969
453279	Homo sapiens: Mitotic G1-G1/S phases	119	Up	2.38558e-06	0.000213775
69306	Homo sapiens: DNA Replication	94	Up	2.27029e-06	0.000213775
912446	Homo sapiens: Meiotic recombination	39	Up	2.63133e-06	0.000223386
73886	Homo sapiens: Chromosome Maintenance	65	Up	2.81178e-06	0.00022677
174417	Homo sapiens: Telomere C-strand (Lagging Strand) Synthesis	21	Up	3.48816e-06	0.000255746
180786	Homo sapiens: Extension of Telomeres	21	Up	3.48816e-06	0.000255746
209776	Homo sapiens: Amine-derived hormones	1	Down	4.51607e-06	0.000291377
209968	Homo sapiens: Thyroxine biosynthesis	1	Down	4.51607e-06	0.000291377
350864	Homo sapiens: Regulation of thyroid hormone activity	1	Down	4.51607e-06	0.000291377
977347	Homo sapiens: Serine biosynthesis	3	Up	4.89471e-06	0.00030366
68874	Homo sapiens: M/G1 Transition	74	Up	6.01331e-06	0.00034641
69002	Homo sapiens: DNA Replication Pre-Initiation	74	Up	6.01331e-06	0.00034641
157579	Homo sapiens: Telomere Maintenance	37	Up	1.69259e-05	0.000910051
69239	Homo sapiens: Synthesis of DNA	90	Up	1.69001e-05	0.000910051
69242	Homo sapiens: S Phase	112	Up	2.09369e-05	0.0010894
69186	Homo sapiens: Lagging Strand Synthesis	19	Up	2.5291e-05	0.00127482
418555	Homo sapiens: G alpha (s) signalling events	27	Up	2.93478e-05	0.00143448
380994	Homo sapiens: ATF4 activates genes	6	Up	3.34525e-05	0.00158703
5603027	Homo sapiens: IKBKG deficiency causes anhidrotic ectodermal dysplasia with immunodeficiency (EDA-ID) (via TLR)	7	Up	4.70734e-05	0.00216941
113507	Homo sapiens: E2F-enabled inhibition of pre-replication complex formation	10	Up	5.94428e-05	0.00259138
75205	Homo sapiens: Dissolution of Fibrin Clot	5	Up	5.83508e-05	0.00259138
174430	Homo sapiens: Telomere C-strand synthesis initiation	5	Up	7.27555e-05	0.00300909
68952	Homo sapiens: DNA replication initiation	5	Up	7.27555e-05	0.00300909
5603029	Homo sapiens: IkBA variant leads to EDA-ID	6	Up	8.80238e-05	0.00354956
389960	Homo sapiens: Formation of tubulin folding intermediates by CCT/TriC	19	Up	0.000133433	0.00524946
69166	Homo sapiens: Removal of the Flap Intermediate	13	Up	0.000160038	0.00606327
69183	Homo sapiens: Processive synthesis on the lagging strand	15	Up	0.000161637	0.00606327
212300	Homo sapiens: PRC2 methylates histones and DNA	33	Up	0.000188311	0.00690332
5578749	Homo sapiens: Transcriptional regulation by small RNAs	64	Up	0.000202927	0.0072738
1810476	Homo sapiens: RIP-mediated NFkB activation via ZBP1	8	Up	0.00021092	0.00739595
5250971	Homo sapiens: Toxicity of botulinum toxin type C (BoNT/C)	2	Up	0.000227598	0.00781098
1606322	Homo sapiens: ZBP1(DAI) mediated induction of type I IFNs	10	Up	0.000246987	0.00813042
425374	Homo sapiens: Amino acid and oligopeptide SLC transporters	22	Up	0.00024584	0.00813042
1500620	Homo sapiens: Meiosis	62	Up	0.000290264	0.00936393
419524	Homo sapiens: Fanconi Anemia pathway	23	Up	0.000300423	0.00950161
1538133	Homo sapiens: G0 and Early G1	21	Up	0.000349975	0.0104539
1640170	Homo sapiens: Cell Cycle	447	Up	0.000344047	0.0104539
397014	Homo sapiens: Muscle contraction	37	Down	0.000340537	0.0104539
190873	Homo sapiens: Gap junction degradation	3	Down	0.000418211	0.012265
68689	Homo sapiens: CDC6 association with the ORC:origin complex	8	Up	0.000453762	0.01307
113501	Homo sapiens: Inhibition of replication initiation of damaged DNA by RB1/E2F1	6	Up	0.00049334	0.0139607
982772	Homo sapiens: Growth hormone receptor signaling	18	Up	0.000585102	0.0162719
69278	Homo sapiens: Cell Cycle, Mitotic	379	Up	0.000626739	0.0171344
165054	Homo sapiens: Rev-mediated nuclear export of HIV RNA	30	Up	0.000676616	0.0178915
427359	Homo sapiens: SIRT1 negatively regulates rRNA Expression	28	Up	0.000665919	0.0178915
390466	Homo sapiens: Chaperonin-mediated protein folding	26	Up	0.000696657	0.0181243
352230	Homo sapiens: Amino acid transport across the plasma membrane	17	Up	0.000730098	0.0186928
381042	Homo sapiens: PERK regulates gene expression	10	Up	0.000818865	0.0203205
446353	Homo sapiens: Cell-extracellular matrix interactions	18	Down	0.000815548	0.0203205
174411	Homo sapiens: Polymerase switching on the C-strand of the telomere	12	Up	0.000859013	0.0203763
69091	Homo sapiens: Polymerase switching	12	Up	0.000859013	0.0203763
69109	Homo sapiens: Leading Strand Synthesis	12	Up	0.000859013	0.0203763
109979	Homo sapiens: Gap-filling DNA repair synthesis and ligation in TC-NER	16	Up	0.000903639	0.0208224
74969	Homo sapiens: Gap-filling DNA repair synthesis and ligation in GG-NER	16	Up	0.000903639	0.0208224
109977	Homo sapiens: Repair synthesis for gap-filling by DNA polymerase in TC-NER	14	Up	0.00104268	0.0227647
1663150	Homo sapiens: The activation of arylsulfatases	10	Down	0.00106468	0.0227647
445355	Homo sapiens: Smooth Muscle Contraction	26	Down	0.00108672	0.0227647
5334118	Homo sapiens: DNA methylation	24	Up	0.00107337	0.0227647
606279	Homo sapiens: Deposition of new CENPA-containing nucleosomes at the centromere	38	Up	0.00106588	0.0227647
74967	Homo sapiens: Repair synthesis of patch ~27-30 bases long by DNA polymerase	14	Up	0.00104268	0.0227647
774815	Homo sapiens: Nucleosome assembly	38	Up	0.00106588	0.0227647
177243	Homo sapiens: Interactions of Rev with host cellular proteins	32	Up	0.00110991	0.0229525
1299316	Homo sapiens: TWIK-releated acid-sensitive K+ channel (TASK)	1	Up	0.0011697	0.0238826
196071	Homo sapiens: Metabolism of steroid hormones and vitamin D	12	Up	0.00121188	0.0241328
209943	Homo sapiens: Steroid hormones	12	Up	0.00121188	0.0241328
1296346	Homo sapiens: Tandem pore domain potassium channels	4	Up	0.0012925	0.0252962
69200	Homo sapiens: Phosphorylation of proteins involved in G1/S transition by active Cyclin E:Cdk2 complexes	4	Up	0.00130167	0.0252962
388479	Homo sapiens: Vasopressin-like receptors	1	Down	0.00132273	0.0253996
909733	Homo sapiens: Interferon alpha/beta signaling	37	Up	0.00134151	0.025457
110373	Homo sapiens: Resolution of AP sites via the multiple-nucleotide patch replacement pathway	18	Up	0.00136459	0.0255939
3000171	Homo sapiens: Non-integrin membrane-ECM interactions	46	Down	0.00150458	0.0278953
2500257	Homo sapiens: Resolution of Sister Chromatid Cohesion	86	Up	0.00160489	0.0294169
166020	Homo sapiens: Transfer of LPS from LBP carrier to CD14	1	Up	0.00166952	0.0301072
68877	Homo sapiens: Mitotic Prometaphase	93	Up	0.00167988	0.0301072
389958	Homo sapiens: Cooperation of Prefoldin and TriC/CCT in actin and tubulin folding	25	Up	0.00175429	0.0310953
419812	Homo sapiens: Calcitonin-like ligand receptors	2	Up	0.00182487	0.0319948
933542	Homo sapiens: TRAF6 mediated NF-kB activation	15	Up	0.00187873	0.0325849
5651801	Homo sapiens: PCNA-Dependent Long Patch Base Excision Repair	16	Up	0.00191307	0.0328275
111448	Homo sapiens: Activation of NOXA and translocation to mitochondria	4	Up	0.0019935	0.0338476
189200	Homo sapiens: Hexose transport	31	Up	0.00212824	0.0346753
194002	Homo sapiens: Glucocorticoid biosynthesis	1	Up	0.00210981	0.0346753
69620	Homo sapiens: Cell Cycle Checkpoints	117	Up	0.00207978	0.0346753
70153	Homo sapiens: Glucose transport	31	Up	0.00212824	0.0346753
389957	Homo sapiens: Prefoldin mediated transfer of substrate to CCT/TriC	24	Up	0.00246133	0.0397012
197264	Homo sapiens: Nicotinamide salvaging	4	Up	0.00269203	0.0429925
68867	Homo sapiens: Assembly of the pre-replicative complex	61	Up	0.00294175	0.0465201
